# Supplementary material
Source: PubMed Central journal article supplement (PMC3394183)
Supplement: NIHMS386276-supplement-Supplemental.pdf [file NIHMS386276-supplement-Supplemental.pdf]

# Suppl. Figure 1

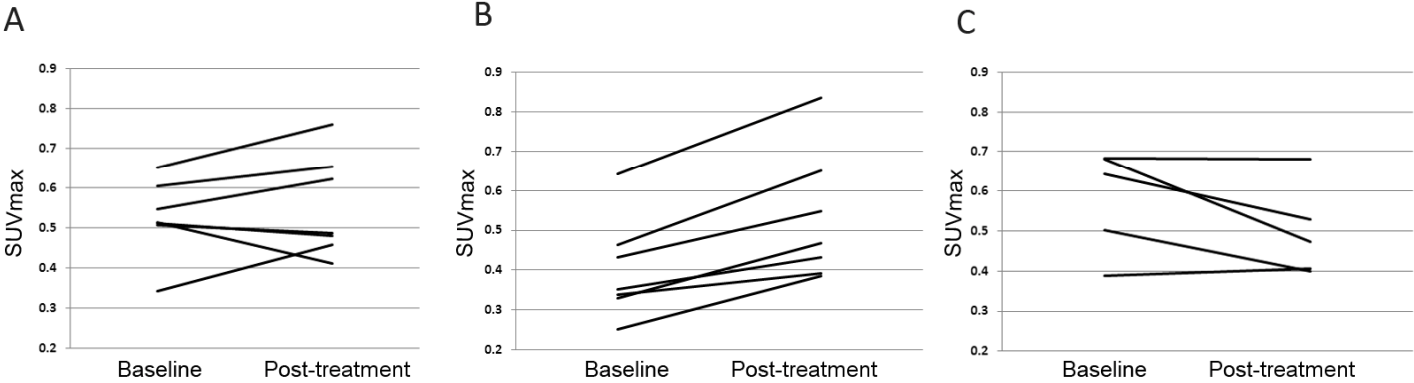

## $^{18}\text{F}$ -FMISO $\text{SUV}_{\text{max}}$ before and after treatment with DMXAA

**A**, vehicle-only control tumors; **B**, DMXAA-1 group (as determined by  $\text{SUV}_{\text{mean}}$ ); **C**, DMXAA-2 group (as determined by  $\text{SUV}_{\text{mean}}$ ).

Suppl Figure 2

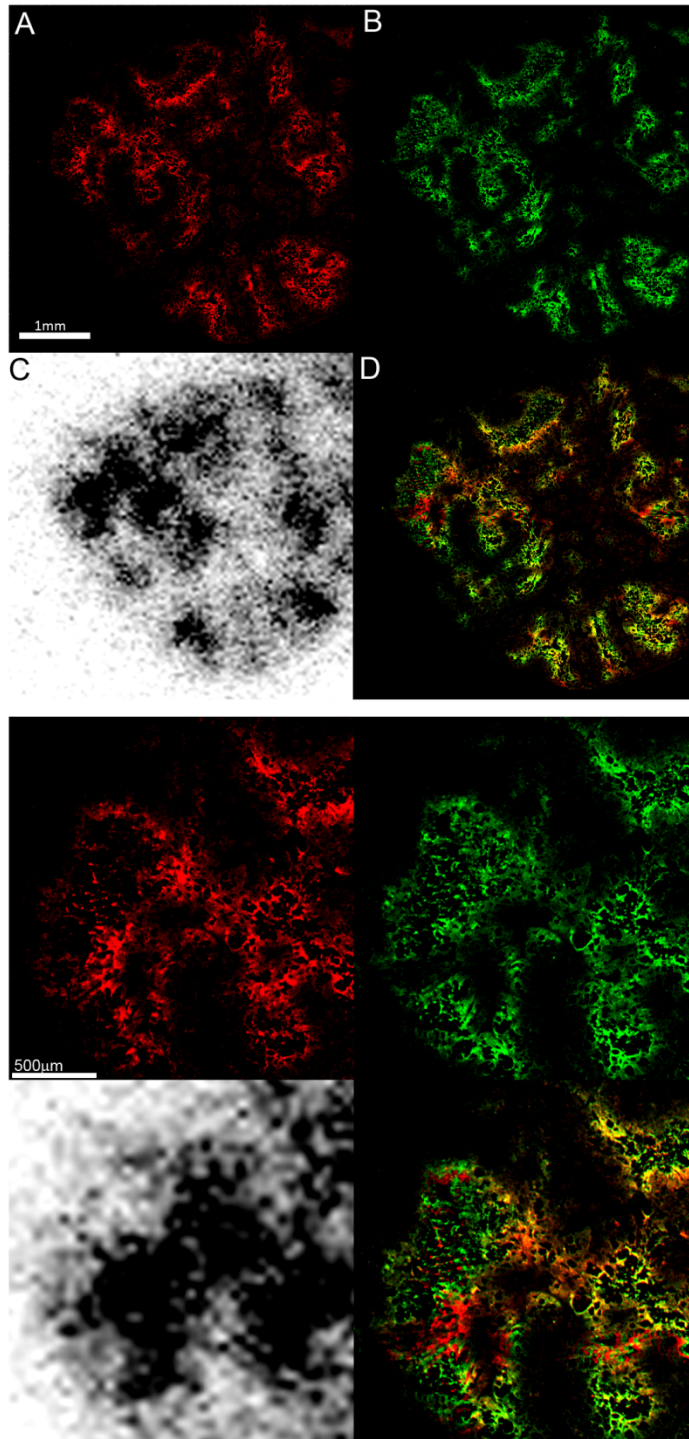

**Comparison of <sup>18</sup>F-FMISO DAR and IHC staining of tumor hypoxia on an untreated (control) tumor at high resolution**

**Upper panel:** A, EF5 distribution; B, Pimonidazole distribution; C, <sup>18</sup>F-FMISO DAR; D, Combined EF5 (red) and pimonidazole (green) distribution, colocalized regions in yellow.

**Lower panel:** as above, central region magnified.

Figure 3

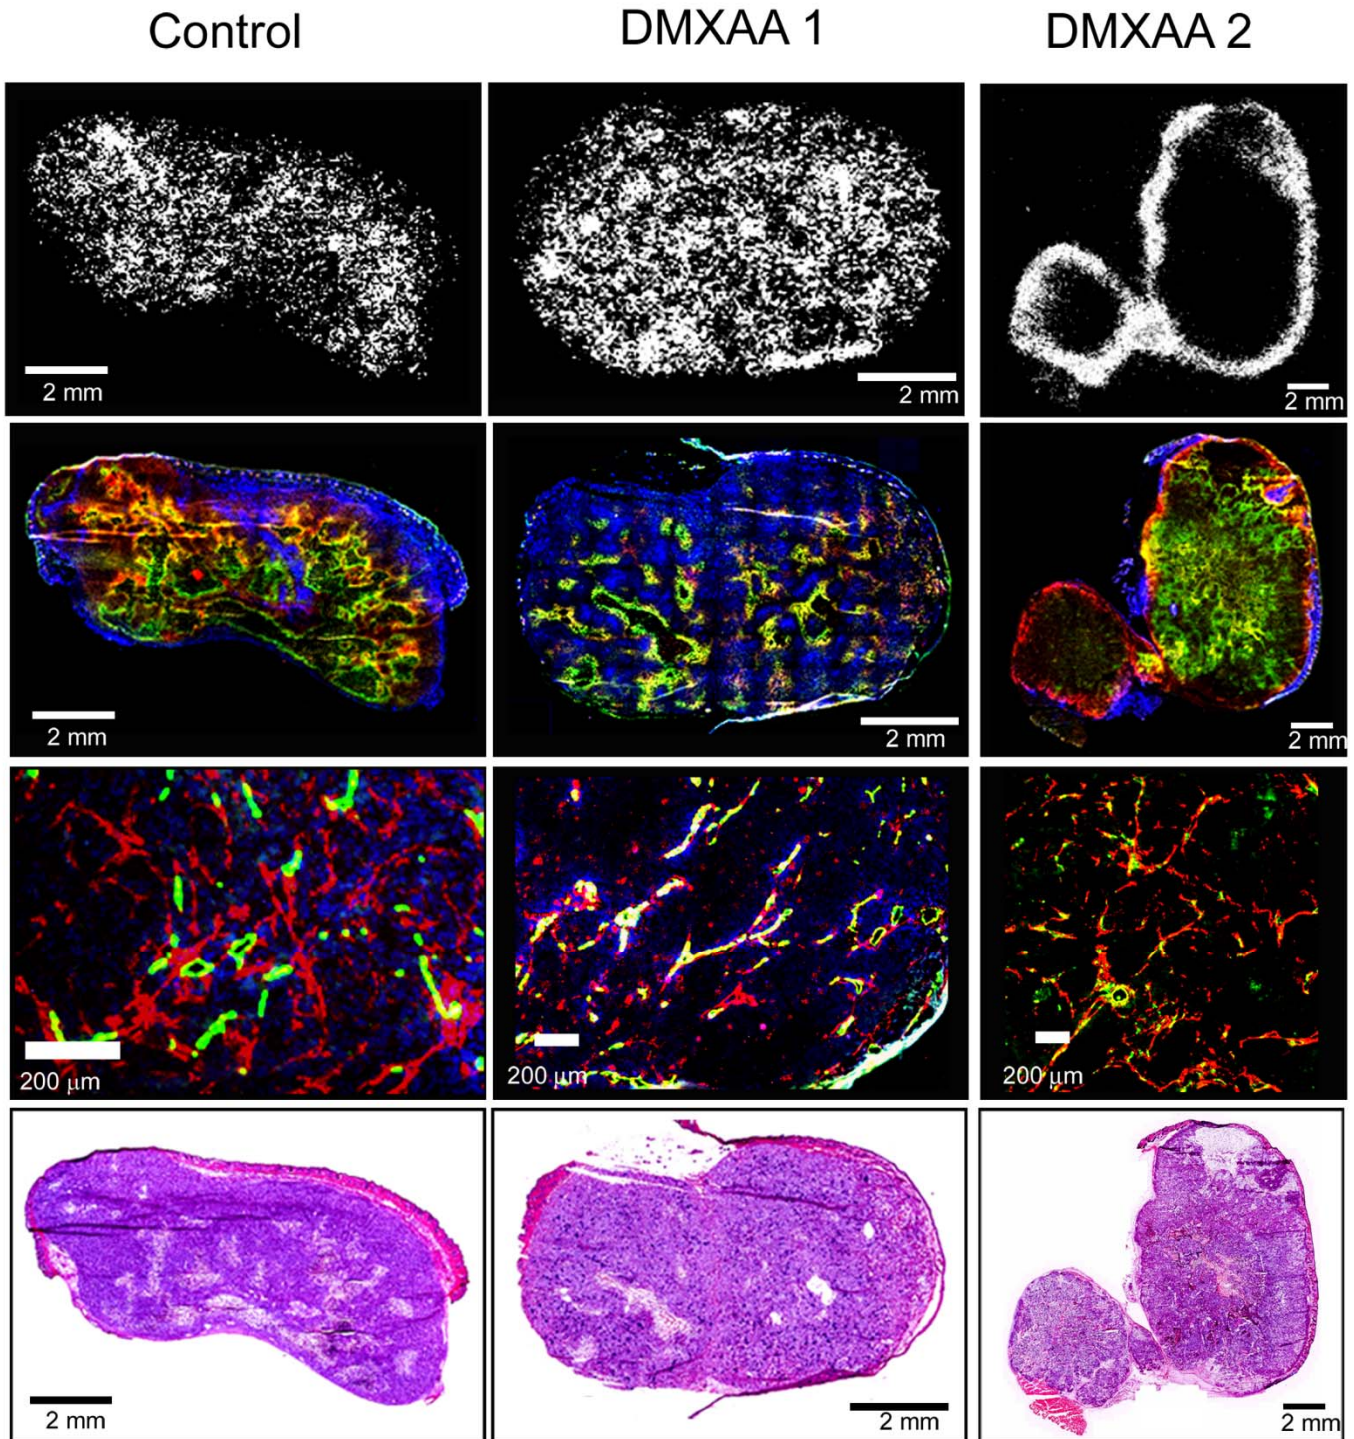

**Comparison of  $^{18}\text{F}$ -FMISO DAR and IHC staining of tumor hypoxia and vasculature**

First row:  $^{18}\text{F}$ -FMISO DAR; second row: composite fluorescence image of Hoechst 33342 (blue), pimonidazole (green) and EF5 (red); third row: composite fluorescence image of endothelial cell staining with anti-CD31 antibody (green), pericyte staining with anti- $\alpha$ -SMA antibody (red) and Hoechst 33342 (blue); fourth row: H&E stained sections.
